# Supplementary material
Source: publisher figshare collection journal article supplement (https://wiley.figshare.com/articles/dataset/_/3516074)
Supplement: Supplementary file 1 [file 1 › appendix-A.htm]

Ecological Archives A021-048-A1


### *Ecological Archives* A021-048-A1

### **Denis Valle. 2011. Incorrect representation of uncertainty on the modeling of growth leads to biased estimates of future biomass. *Ecological Applications* 21:1031–1036.**

Appendix A. Description of parameter estimation method.

> View / download PDF.

---


[Back to A021-048]
